# Supplementary material
Source: PubMed Central journal article supplement (PMC4908178)
Supplement: mmc1.pdf [file mmc1.pdf]

## Supplemental Data

### Loss-of-Function Mutations in *FRRS1L*

#### Lead to an Epileptic-Dyskinetic Encephalopathy

Marianna Madeo, Michelle Stewart, Yuyang Sun, Nadia Sahir, Sarah Wiethoff, Indra Chandrasekar, Anna Yarrow, Jill A. Rosenfeld, Yaping Yang, Dawn Cordeiro, Elizabeth M. McCormick, Colleen C. Muraresku, Tyler N. Jepperson, Lauren J. McBeth, Mohammed Zain Seidahmed, Heba Y. El Khashab, Muddathir Hamad, Hamid Azzedine, Karl Clark, Silvia Corrochano, Sara Wells, Mariet W. Elting, Marjan M. Weiss, Sabrina Burn, Angela Myers, Megan Landsverk, Patricia L. Crotwell, Quinten Waisfisz, Nicole I. Wolf, Patrick M. Nolan, Sergio Padilla-Lopez, Henry Houlden, Richard Lifton, Shrikant Mane, Brij B. Singh, Marni J. Falk, Saadet Mercimek-Mahmutoglu, Kaya Bilguvar, Mustafa A. Salih, Abraham Acevedo-Arozena, and Michael C. Kruer

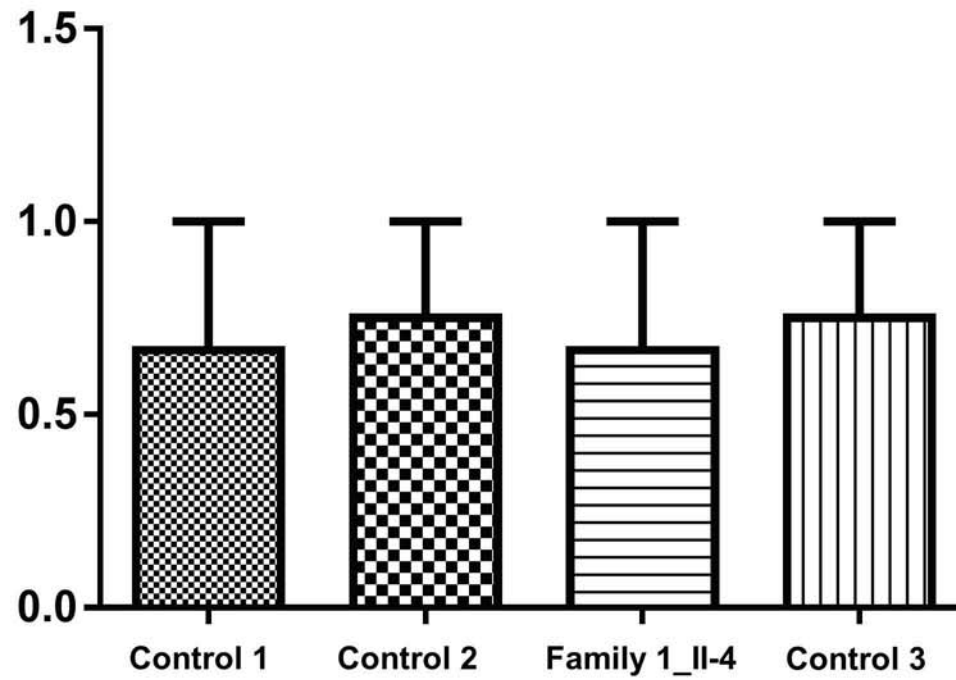

Figure S1. RT-PCR shows similar amounts of *FRRS1L* transcript in c.961C>T affected cells when compared to controls (mean  $\pm$  SEM from n = 3 experiments)

**Table S1. Regions of homozygosity shared by index family members**

| <b>Chromosome</b> | <b>Start</b> | <b>End</b>  | <b>Size (Mb)</b> |
|-------------------|--------------|-------------|------------------|
| <b>1</b>          | 147,779,938  | 151,347,700 | 3.5              |
| <b>3</b>          | 62,613       | 4,878,792   | 4.8              |
| <b>9</b>          | 104,622,396  | 119,149,440 | 14.5             |
| <b>16</b>         | 31,901,547   | 35,220,544  | 3.3              |
| <b>X</b>          | 61,932,503   | 65,386,406  | 3.5              |

**Table S2. Rare heterozygous *FRRS1L* sequence variants identified in a cohort of >500 individuals with neurodegenerative disease**

| <b><i>FRRS1L</i><br/>variant</b>  | <b>ESP6500</b> | <b>ExAc</b> | <b>Phenotype</b>                |
|-----------------------------------|----------------|-------------|---------------------------------|
| <b>c.469T&gt;A;<br/>(p.C157S)</b> | -              | 8.13E-06    | Ataxia, optic nerve atrophy     |
| <b>c.469T&gt;A;<br/>(p.C157S)</b> | -              | 8.13E-06    | Ataxia, intellectual disability |
| <b>c.721delG;<br/>(p.A241fs)</b>  | -              | 8.13E-06    | Multiple system atrophy         |
| <b>c.686T&gt;C;<br/>(p.V229A)</b> | 0.000231       | 7.40E-04    | Ataxia                          |
| <b>c.885A&gt;G;<br/>(p.I295M)</b> | 0.000077       | 1.63E-05    | Multiple system atrophy         |
